# Supplementary material
Source: publisher figshare collection journal article supplement (https://asha.figshare.com/articles/dataset/_/16632649)
Supplement: Supplementary file 1 [file 1]

**Supplemental Material S4. Percentage of studies that addressed each quality indicator.**

| <b>Indicator</b> | <b>Design</b> | <b>Description</b>                                                                                                         | <b><i>n</i></b> | <b>Valid %</b> |
|------------------|---------------|----------------------------------------------------------------------------------------------------------------------------|-----------------|----------------|
| 1.1              | Both          | Describes critical features of context or setting                                                                          | 51              | 92.7%          |
| 2.1              | Both          | Describes relevant participant demographics                                                                                | 50              | 90.9%          |
| 2.2              | Both          | Group of interest defined and method of establishing group membership is described                                         | 51              | 92.7%          |
| 3.1              | Both          | Role of intervention agent and relevant characteristics described                                                          | 47              | 85.5%          |
| 3.2              | Both          | Describes specific trainings or qualifications of the intervention agent                                                   | 42              | 76.4%          |
| 4.1              | Both          | Provides detailed intervention procedures, intervention agent's actions, and/or cites where this information is accessible | 52              | 94.5%          |
| 4.2              | Both          | Describes specific materials used and/or cites where this information is accessible                                        | 52              | 94.5%          |
| 5.1              | Both          | Assesses and reports on implementation fidelity related to adherence to protocols                                          | 37              | 67.3%          |
| 5.2              | Both          | Assesses and reports implementation fidelity related to dosage                                                             | 31              | 56.4%          |
| 5.3              | Both          | Implementation fidelity is assessed and reported on regularly and for each interventionist                                 | 34              | 61.8%          |
| 6.1              | Both          | The researcher controls the independent variable                                                                           | 55              | 100.0%         |
| 6.2              | Both          | Study describes baseline (SCED) or comparisons group (EGC) conditions                                                      | 48              | 87.3%          |
| 6.3              | Both          | No or limited access to the intervention by the control/comparison group (EGC) or at baseline (SCED)                       | 53              | 96.4%          |
| 6.4              | EGC           | Assignment to groups is clearly described                                                                                  | 28              | 82.4%          |
| 6.5              | SCED          | Intervention effects are reported for at least three different time points                                                 | 18              | 85.7%          |
| 6.6              | SCED          | Baseline phase includes at least three data points                                                                         | 13              | 61.9%          |
| 6.7              | SCED          | Controls for threats to internal validity                                                                                  | 9               | 42.9%          |
| 6.8              | EGC           | Low attrition across groups                                                                                                | 28              | 82.4%          |
| 6.9              | EGC           | Low differential attrition                                                                                                 | 26              | 76.5%          |
| 7.1              | Both          | Outcomes are socially important                                                                                            | 54              | 98.2%          |
| 7.2              | Both          | Measurement of dependent variables is clearly defined and described                                                        | 53              | 96.4%          |
| 7.3              | Both          | Effects of intervention on all measures is reported                                                                        | 46              | 83.6%          |
| 7.4              | Both          | Frequency and timing of outcome measures appropriate                                                                       | 47              | 85.5%          |
| 7.5              | Both          | Study provides evidence of reliability                                                                                     | 42              | 76.4%          |
| 7.6              | EGC           | Study provides adequate evidence of validity                                                                               | 29              | 85.3%          |
| 8.1              | EGC           | Data analysis appropriate for two or more groups                                                                           | 31              | 91.2%          |
| 8.2              | SCED          | Single subject graph presented                                                                                             | 17              | 81.0%          |
| 8.3              | ECG           | Study reports effect size, or provides raw data for which can be calculated                                                | 31              | 91.2%          |

*Note.* EGC = experimental group comparison; SCED = single-case experimental design; Both = applies to EGC and SCED studies. Summarized from the Council for Exceptional Children (2014) quality indicators.
