# Supplementary material
Source: publisher figshare collection journal article supplement (https://asha.figshare.com/articles/dataset/_/16632649)
Supplement: Supplementary file 2 [file 1]

**Supplemental Material S5.** Effect sizes for high quality interventions for each language examined.

| CEC Group              | Domain                                                          | Intervention Name                                                                 | Evidence Level | Group          | Mean Effect Sizes <sup>†</sup> | Community Language Effect Sizes | Home Language Effect Sizes | Community/Home Language Effect Sizes |
|------------------------|-----------------------------------------------------------------|-----------------------------------------------------------------------------------|----------------|----------------|--------------------------------|---------------------------------|----------------------------|--------------------------------------|
| EBP                    | Early Literacy                                                  | Nuestros Niños <sup>2, 3</sup>                                                    | Ib             | At Risk        | $d^b = 0.32$                   | $d^b = 0.10$                    | $d^b = 0.54$               | -                                    |
| Potentially EBP        | Receptive Vocabulary                                            | Literacy Express Preschool Curriculum: Bilingual <sup>4</sup>                     | Ib             | At Risk        | $d^b = 0.55$                   | $d^b = 0.56$                    | $d^b = 0.53$               | -                                    |
|                        |                                                                 | Shared Storybook Reading <sup>8</sup>                                             | Ib             | At Risk        | $\eta^2 = 0.85$                | $\eta^2 = 0.85$                 | -                          | -                                    |
|                        |                                                                 | Words of Oral Reading and Language Development <sup>9</sup>                       | Ib             | At Risk        | $d^b = 0.71$                   | $d^b = 0.71$                    | -                          | -                                    |
|                        | Expressive Vocabulary                                           | Focused Stimulation Approach: Monolingual <sup>13</sup>                           | Ib             | DLD            | $d^a = 0.78$                   | $d^a = 0.78$                    | -                          | -                                    |
|                        |                                                                 | Focused Stimulation Approach: Bilingual <sup>13</sup>                             | Ib             | DLD            | $d^a = 0.49$                   | $d^a = 0.49$                    | -                          | -                                    |
|                        |                                                                 | Literacy Express Preschool Curriculum: Bilingual <sup>4</sup>                     | Ib             | At Risk        | $d^b = 0.58$                   | $d^b = 0.74$                    | $d^b = 0.39$               | -                                    |
|                        |                                                                 | Shared Storybook Reading <sup>8</sup>                                             | Ib             | At Risk        | $\eta^2 = 0.58$                | $\eta^2 = 0.58$                 | -                          | -                                    |
|                        |                                                                 | Storytelling for the Home Enrichment of Language and Literacy Skills <sup>1</sup> | Ib             | At Risk        | $d^a = 0.60$                   | -                               | -                          | $d^a = 0.60$                         |
|                        |                                                                 | Words of Oral Reading and Language Development <sup>9</sup>                       | Ib             | At Risk        | $d^b = 0.42$                   | $d^b = 0.42$                    | -                          | -                                    |
|                        | Receptive Language                                              | Focused Stimulation Approach: Monolingual <sup>13#</sup>                          | Ib             | DLD            | $d^a = 0.59$                   | $d^a = 0.59$                    | -                          | -                                    |
|                        |                                                                 | Focused Stimulation Approach: Bilingual <sup>13#</sup>                            | Ib             | DLD            | $d^a = 0.38$                   | $d^a = 0.38$                    | -                          | -                                    |
|                        | Expressive Language                                             | Supplemental Instruction Program <sup>10</sup>                                    | IIa            | At Risk        | $d^a = 0.63$                   | -                               | $d^a = 0.63$               | -                                    |
|                        | Language                                                        | Nuestros Niños <sup>2</sup>                                                       | Ib             | At Risk        | $d^b = 0.26$                   | $d^b = -0.15$                   | $d^b = 0.41$               | -                                    |
| Early Literacy         | Literacy Express Preschool Curriculum: Bilingual <sup>4</sup>   | Ib                                                                                | At Risk        | $d^b = 0.73$   | $d^b = 0.40$                   | $d^b = 0.52$                    | -                          |                                      |
| Phonological Awareness | Intervention for Phonemic Awareness <sup>6</sup>                | IIa                                                                               | At Risk        | $d_2^c = 1.34$ | $d_2^c = 1.34$                 | -                               | -                          |                                      |
|                        | Literacy Express Preschool Curriculum: Monolingual <sup>4</sup> | Ib                                                                                | At Risk        | $d^b = 0.28$   | $d^b = 0.48$                   | $d^b = 0.08$                    | -                          |                                      |

|                       |                       |                                                                                         |     |         |                        |                        |               |   |
|-----------------------|-----------------------|-----------------------------------------------------------------------------------------|-----|---------|------------------------|------------------------|---------------|---|
|                       |                       | Literacy Express Preschool Curriculum: Bilingual <sup>4</sup>                           | Ib  | At Risk | $d^b = 0.50$           | $d^b = 0.48$           | $d^b = 0.56$  | - |
|                       |                       | Preparing Pequeños <sup>7</sup>                                                         | Ib  | At Risk | $d^b = 0.32$           | $d^b = 0.14$           | $d^b = 0.41$  | - |
|                       | Writing               | Nuestros Niños <sup>3</sup>                                                             | Ib  | At Risk | $d^b = 0.27$           | $d^b = 0.20$           | $d^b = -0.16$ | - |
| Insufficient Evidence | Receptive Vocabulary  | Dual language narrative intervention with embedded vocabulary instruction <sup>12</sup> | IIa | At Risk | $d^b = 0.66$           | $d^b = 0.98$           | $d^b = 0.34$  | - |
|                       |                       | Focused Stimulation Approach: Monolingual <sup>13#</sup>                                | Ib  | DLD     | $d^a = 0.02$           | $d^a = 0.02$           | -             | - |
|                       |                       | Focused Stimulation Approach: Bilingual <sup>13#</sup>                                  | Ib  | DLD     | $d^a = -0.24$          | $d^a = -0.24$          | -             | - |
|                       |                       | Hablemos Juntos <sup>15</sup>                                                           | Ib  | At Risk | $g^b = 0.24$           | -                      | $g^b = 0.24$  | - |
|                       |                       | Literacy Express Preschool Curriculum: Monolingual <sup>4</sup>                         | Ib  | At Risk | $d^b = 0.20$           | $d^b = 0.34$           | $d^b = 0.05$  | - |
|                       |                       | Nuestros Niños <sup>2, 3</sup>                                                          | Ib  | At Risk | $d^b = 0.07$           | $d^b = -0.05$          | $d^b = 0.18$  | - |
|                       |                       | Opstap Opnieuw <sup>14</sup>                                                            | IIa | At Risk | $d^b = 0.00$           | $d^b = -0.10$          | $d^b = 0.09$  | - |
|                       |                       | Technology-Assisted Storybook Intervention <sup>5</sup>                                 | IIa | At Risk | NAP <sup>d</sup> = 73% | NAP <sup>d</sup> = 73% | -             | - |
|                       | Expressive Vocabulary | Hablemos Juntos <sup>15</sup>                                                           | Ib  | At Risk | $g^b = -0.01$          | $g^b = -0.03$          | $g^b = 0.02$  | - |
|                       |                       | Literacy Express Preschool Curriculum: Monolingual <sup>4</sup>                         | Ib  | At Risk | $d^b = 0.20$           | $d^b = 0.37$           | $d^b = 0.02$  | - |
|                       |                       | Nuestros Niños <sup>3</sup>                                                             | Ib  | At Risk | $d^b = 0.17$           | $d^b = 0.18$           | $d^b = 0.14$  | - |
|                       |                       | Opstap Opnieuw <sup>14</sup>                                                            | IIa | At Risk | $d^b = 0.02$           | $d^b = 0.03$           | $d^b = -0.06$ | - |
|                       |                       | Preparing Pequeños <sup>7</sup>                                                         | Ib  | At Risk | $d^b = 0.05$           | $d^b = -0.05$          | $d^b = 0.14$  | - |
|                       | Expressive Language   | Focused Stimulation Approach: Monolingual <sup>13</sup>                                 | Ib  | DLD     | NC                     | NC                     | NC            | - |
|                       |                       | Focused Stimulation Approach: Bilingual <sup>13</sup>                                   | Ib  | DLD     | NC                     | NC                     | NC            | - |
|                       |                       | Vocabulary, Oral Language and Academic Readiness <sup>11</sup>                          | IIa | At Risk | $d^a = 0.05$           | $d^a = -0.11$          | $d^a = 0.22$  | - |
|                       |                       | Vocabulary, Oral Language and Academic Readiness <sup>11</sup>                          | IIa | DLD     | $d^a = -0.12$          | $d^a = -0.09$          | $d^a = -0.15$ | - |
|                       | Language              | Preparing Pequeños <sup>7</sup>                                                         | Ib  | At Risk | $d^b = 0.01$           | $d^b = -0.02$          | $d^b = 0.05$  | - |
|                       |                       | Nuestros Niños <sup>2</sup>                                                             | Ib  | At Risk | $d^b = -0.11$          | $d^b = 0.23$           | $d^b = -0.34$ | - |

|                        |                                                                                         |    |         |                        |                        |              |   |
|------------------------|-----------------------------------------------------------------------------------------|----|---------|------------------------|------------------------|--------------|---|
| Receptive Narrative    | Technology-Assisted Storybook Intervention <sup>5</sup>                                 | Ia | At Risk | NAP <sup>d</sup> = 65% | NAP <sup>d</sup> = 65% | -            | - |
| Expressive Narrative   | Dual language narrative intervention with embedded vocabulary instruction <sup>12</sup> | Ia | At Risk | Positive               | Positive               | Neutral      | - |
| Morpho-syntax          | Focused Stimulation Approach: Monolingual <sup>13</sup>                                 | Ib | DLD     | NC                     | NC                     | -            | - |
|                        | Focused Stimulation Approach: Bilingual <sup>13</sup>                                   | Ib | DLD     | NC                     | NC                     | -            | - |
| Early Literacy         | Literacy Express Preschool Curriculum: Monolingual <sup>4</sup>                         | Ib | At Risk | $d^b = 0.24$           | $d^b = 0.40$           | $d^b = 0.07$ | - |
|                        | Preparing Pequeños <sup>7</sup>                                                         | Ib | At Risk | $d^b = 0.11$           | $d^b = 0.01$           | $d^b = 0.20$ | - |
| Phonological Awareness | Nuestros Niños <sup>2,3</sup>                                                           | Ib | At Risk | $d^b = -0.03$          | $d^b = 0.24$           | -            | - |

Note. † = Where the same domain was examined in more than one language, the average effect size is presented. # = Effect size calculations based on standardised test results only (data were not available for vocabulary probes). *Abbreviations.* EBP = evidence-based practice; DLD = developmental language disorder. Ib = well-designed randomized controlled study; Ia = well-designed controlled study without randomization. *Effect Sizes.* <sup>a</sup> =  $d_{pcc}$  calculated by the authors from means, standard deviations and sample sizes reported by study authors, following Morris (2008); <sup>b</sup> = value reported by study authors; <sup>c</sup> = individual effect size following Busk and Serlin (1992) as reported by the study authors; <sup>d</sup> = Nonoverlap of All Pairs (NAP) effect-size index for single-case designs as described by Parker and Vannest (2009); NC = not able to be calculated. *Citations.* <sup>1</sup>Boyce et al. (2010); <sup>2</sup>Buysse et al. (2010); <sup>3</sup>Castro et al. (2017); <sup>4</sup>Farver et al. (2009); <sup>5</sup>Greenwood et al. (2016); <sup>6</sup>Koutsoftas et al. (2009); <sup>7</sup>Landry et al. (2019); <sup>8</sup>Lugo-Neris et al. (2010); <sup>9</sup>Pollard-Durodola et al. (2018); <sup>10</sup>Restapo et al. (2010); <sup>11</sup>Simon-Cerejido and Gutiérrez-Clellen (2014); <sup>12</sup>Spencer et al. (2019); <sup>13</sup>Thordardottir et al. (2015); <sup>14</sup>van Tuijl et al. (2001); <sup>15</sup>Zucker et al. (2021).

## References

- Boyce, L. K., Innocenti, M. S., Roggman, L. A., Norman, V. K. J., & Ortiz, E. (2010). Telling stories and making books: Evidence for an intervention to help parents in migrant head start families support their children's language and literacy. *Early Education and Development, 21*(3), 343-371. <https://doi.org/10.1080/10409281003631142>
- Busk, P. L., & Serlin, R. C. (1992). Meta-analysis for single case research. In T. R. Kratochwill & J. R. Levin (Eds.), *Single-case research design and analysis: New directions for psychology and education*. Erlbaum.
- Buysse, V., Castro, D. C., & Peisner-Feinberg, E. (2010). Effects of a professional development program on classroom practices and outcomes for Latino dual language learners. *Early Childhood Research Quarterly, 25*(2), 194-206. <https://doi.org/10.1016/j.ecresq.2009.10.001>
- Castro, D. C., Gillanders, C., Franco, X., Bryant, D. M., Zepeda, M., Willoughby, M. T., & Méndez, L. I. (2017). Early education of dual language learners: An efficacy study of the Nuestros Niños School Readiness professional development program. *Early Childhood Research Quarterly, 40*, 188-203. <https://doi.org/10.1016/j.ecresq.2017.03.002>
- Farver, J. A., Lonigan, C. J., & Eppe, S. (2009). Effective early literacy skill development for young Spanish-speaking English language learners: an experimental study of two methods. *Child Development, 80*(3), 703-719. <https://doi.org/10.1111/j.1467-8624.2009.01292.x>

- Greenwood, C. R., Carta, J. J., Kelley, E. S., Guerrero, G., Kong, N. Y., Atwater, J., & Goldstein, H. (2016). Systematic replication of the effects of a supplementary, technology-assisted, storybook intervention for preschool children with weak vocabulary and comprehension skills. *The Elementary School Journal*, 116(4), 574-599. <https://doi.org/10.1086/686223>
- Koutsoftas, A. D., Harmon, M. T., & Gray, S. (2009). The effect of Tier 2 intervention for phonemic awareness in a response-to-intervention model in low-income preschool classrooms. *Language, Speech, and Hearing Services in Schools*, 40(2), 116-130. [https://doi.org/10.1044/0161-1461\(2008/07-0101\)](https://doi.org/10.1044/0161-1461(2008/07-0101))
- Landry, S. H., Assel, M. A., Carlo, M. S., Williams, J. M., Wu, W., & Montroy, J. J. (2019). The effect of the Preparing Pequeños small-group cognitive instruction program on academic and concurrent social and behavioral outcomes in young Spanish-speaking dual-language learners. *Journal of School Psychology*, 73, 1-20. <https://doi.org/10.1016/j.jsp.2019.01.001>
- Lugo-Neris, M. J., Jackson, C. W., & Goldstein, H. (2010). Facilitating vocabulary acquisition of young English language learners. *Language, Speech, and Hearing Services in Schools*, 41(3), 314-327. [https://doi.org/10.1044/0161-1461\(2009/07-0082\)](https://doi.org/10.1044/0161-1461(2009/07-0082))
- Morris, S. B. (2008). Estimating effect sizes from pretest-posttest-control group designs. *Organizational Research Methods*, 11(2), 364-386. <https://doi.org/10.1177/1094428106291059>
- Parker, R. I., & Vannest, K. (2009). An improved effect size for single-case research: Nonoverlap of all pairs. *Behavior Therapy*, 40(4), 357-367. <https://doi.org/10.1016/j.beth.2008.10.006>
- Pollard-Durodola, S. D., Gonzalez, J. E., Saenz, L., Resendez, N., Kwok, O., Zhu, L., & Davis, H. (2018). The effects of content-enriched shared book reading versus vocabulary-only discussions on the vocabulary outcomes of preschool dual language learners. *Early Education and Development*, 29(2), 245-265. <https://doi.org/10.1080/10409289.2017.1393738>
- Restrepo, M. A., Castilla, A. P., Schwanenflugel, P. J., Neuharth-Pritchett, S., Hamilton, C. E., & Arboleda, A. (2010). Effects of a supplemental Spanish oral language program on sentence length, complexity, and grammaticality in Spanish-speaking children attending English-only preschools. *Language, Speech, and Hearing Services in Schools*, 41(1), 3-13. [https://doi.org/10.1044/0161-1461\(2009/06-0017\)](https://doi.org/10.1044/0161-1461(2009/06-0017))
- Simon-Cerejido, G., & Gutiérrez-Clellen, V. F. (2014). Bilingual education for all: Latino dual language learners with language disabilities. *International Journal of Bilingual Education and Bilingualism*, 17(2), 235-254. <https://doi.org/10.1080/13670050.2013.866630>
- Spencer, T. D., Petersen, D. B., Restrepo, M. A., Thompson, M., & Gutierrez Arvizu, M. N. (2019). The effect of Spanish and English narrative intervention on the language skills of young dual language learners. *Topics in Early Childhood Special Education*, 38(4), 204-219. <https://doi.org/10.1177/0271121418779439>
- Thordardottir, E. T., Cloutier, G., Ménard, S., Pelland-Blais, E., & Rvachew, S. (2015). Monolingual or bilingual intervention for primary language impairment? A randomized control trial. *Journal of Speech, Language, and Hearing Research*, 58, 287-300. [https://doi.org/10.1044/2014\\_JSLHR-L-13-0277](https://doi.org/10.1044/2014_JSLHR-L-13-0277)
- van Tuijl, C., Leseman, P. P. M., & Rispen, J. (2001). Efficacy of an intensive home-based educational intervention programme for 4- to 6-year-old ethnic minority children in the Netherlands. *International Journal of Behavioral Development*, 25(2), 148-159. <https://doi.org/10.1080/01650250042000159>
- Zucker, T. A., Carlo, M. S., Montroy, J. J., & Landry, S. H. (2021). Pilot test of the Hablemos Juntos Tier 2 academic language curriculum for Spanish-speaking preschoolers. *Early Childhood Research Quarterly*, 55, 179-192. <https://doi.org/10.1016/j.ecresq.2020.11.009>
