# Supplementary material
Source: publisher figshare collection journal article supplement (https://asha.figshare.com/articles/dataset/_/16632649)
Supplement: Supplementary file 3 [file 1]

**Supplemental Material S3. Study information.**

| Reference                  | Participants |          |         | Intervention                                                                                           | Delivery     | Study       | Outcomes Investigated          | Intervention Effect  |                                              |
|----------------------------|--------------|----------|---------|--------------------------------------------------------------------------------------------------------|--------------|-------------|--------------------------------|----------------------|----------------------------------------------|
|                            | <i>N</i>     | Age      | Group   |                                                                                                        |              |             |                                | Language(s) Assessed | Domain and Effect Size <sup>4</sup>          |
| Bekman et al. (2011)       | 185          | 6yrs     | At Risk | Summer preschool                                                                                       | E (Ed)       | EGC (91.7)  | LA (VR, NR)<br>LI (Pr)         | Turkish              | LA: $d^b = 0.25$<br>LI: $d^a = 1.11$         |
| Boyce et al. (2010)        | 75           | 1;10-5;0 | At Risk | Storytelling for the Home Enrichment of Language and Literacy Skills (SHELLS)                          | H (Fm)       | EGC (100.0) | LA (VE)                        | English/<br>Spanish  | LA: $d^b = 0.60$                             |
| Brannon and Dauksas (2012) | 30           | 3-5yrs   | At Risk | Parents as Reading Teachers Nightly Encouraging Reading Success (PARTNERS) vs. Traditional Family Time | H (Fm)       | EGC (70.8)  | LA (VE)                        | NS                   | LA: $d^b = 0.39$                             |
| Brannon and Dauksas (2014) | 42           | 3-5yrs   | At Risk | Dialogic Reading Group vs. Family Group Time                                                           | H (Fm)       | EGC (58.3)  | LA (VE)                        | NS                   | LA: $d^b = 0.31$                             |
| Buysse et al. (2010)       | 193          | 3;2-5;10 | At Risk | Nuestros Niños [Our Children]                                                                          | E (Ed)       | EGC (100.0) | LA (VR, NR, L)<br>LI (Pr, Ph)  | English              | LA: $d^b = -0.01$<br>LI: $d^b = 0.26$        |
|                            |              |          |         |                                                                                                        |              |             |                                | Spanish              | LA: $d^b = 0.06$<br>LI: $d^b = 0.46$         |
| Caesar and Nelson (2014)   | 19           | 2;10-5;2 | At Risk | Supporting the Acquisition of Language and Literacy through School–Home Activities (SALSA)             | E&H (Fm, SP) | EGC (83.3)  | LA (NE)<br>LI (Pr, Ph)         | English              | LA: $q^c = 0.10$<br>LI: $q^c = 0.28$         |
|                            |              |          |         |                                                                                                        |              |             |                                | Spanish              | LA: $q^c = 0.00$<br>LI: $q^c = 0.33$         |
| Castro et al. (2017)       | 340          | 4yrs     | At Risk | Nuestros Niños [Our Children]                                                                          | E (Ed)       | EGC (100.0) | LA (VR, VE)<br>LI (Pr, Ph, Wr) | English              | LA: $d^b = 0.19$<br>LI: $d^b = 0.15$         |
|                            |              |          |         |                                                                                                        |              |             |                                | Spanish              | LA: $d^b = 0.20$<br>LI: $d^b = 0.37$         |
| Cooke et al. (2009)        | 3            | 4-5yrs   | At Risk | Audio Prompting using a Talking Photo Album                                                            | H (Fm)       | SCED (86.4) | LA (VE)                        | English              | LA: Positive                                 |
| Correa et al. (2015)       | 4            | 4yrs     | At Risk | Adapted Dialogic Reading                                                                               | E (Re)       | SCED (77.3) | LA (VE, LE)                    | English              | LA: Positive                                 |
| Dockrell et al. (2010)     | 96           | 3-5yrs   | At Risk | Talking Time vs. Story Reading                                                                         | E (Ed)       | EGC (87.5)  | LA (VE, LR, NE, L)             | English              | Talking Time vs Control<br>LA: $d^b = 0.81$  |
|                            |              |          |         |                                                                                                        |              |             |                                |                      | Story Reading vs Control<br>LA: $d^b = 0.69$ |

|                                           |     |          |         |                                                                |              |              |                            |                       |                                                                                                                                        |
|-------------------------------------------|-----|----------|---------|----------------------------------------------------------------|--------------|--------------|----------------------------|-----------------------|----------------------------------------------------------------------------------------------------------------------------------------|
| Farver et al. (2009)                      | 94  | 3;9-5;2  | At Risk | Literacy Express Preschool Curriculum                          | E (Or)       | EGC (100.0)  | LA (VR, VE)<br>LI (Pr, Ph) | English               | English Tx vs Controls<br>LA: $d^b = 0.36$<br>LI: $d^b = 0.45$                                                                         |
|                                           |     |          |         |                                                                |              |              |                            |                       | Bilingual Tx vs Controls<br>LA: $d^b = 0.65$<br>LI: $d^b = 0.60$                                                                       |
|                                           |     |          |         |                                                                |              |              |                            | Spanish               | English Tx vs Controls<br>LA: $d^b = 0.04$<br>LI: $d^b = 0.08$<br><br>Bilingual Tx vs Controls<br>LA: $d^b = 0.46$<br>LI: $d^b = 0.56$ |
| Gildersleeve-Neumann and Goldstein (2015) | 2   | 5;6-5;8  | SSD     | Bilingual therapy for SSD                                      | C (SP)       | SCED (86.4)  | SP (Ac, In)                | English and Spanish   | NA                                                                                                                                     |
| Gonzales and Tejero Hughes (2018)         | 4   | 4;4-5;6  | At Risk | Libros en Mano [Books in Hand]                                 | E (Ed)       | COR          | LI (Pr, Ph)                | English and Spanish   | NA                                                                                                                                     |
| Greenwood et al. (2016)                   | 9   | 4;5-5;2  | At Risk | Technology-assisted storybook intervention                     | E (Re, Te)   | SCED (100.0) | LA (VR, NR)                | English               | LA: NAP <sup>f</sup> = 68%                                                                                                             |
| Gutiérrez-Clellen et al. (2012)           | 185 | 4;0-4,11 | DLD     | Academic enrichment group activities                           | E (Ed)       | EGC (95.8)   | LA (LE)                    | English               | LA: NC                                                                                                                                 |
| Hammer and Sawyer (2016)                  | 73  | 3;7-5;6  | At Risk | Madres educando a sus niños [Mothers educating their children] | H (Fm)       | EGC (83.3)   | LA (V, VE, LE)             | English               | LA: $d^b = -0.25$                                                                                                                      |
|                                           |     |          |         |                                                                |              |              |                            | Spanish               | LA: $d^b = -0.19$                                                                                                                      |
|                                           |     |          |         |                                                                |              |              |                            | English/Spanish       | LA: $d^b = 0.27$                                                                                                                       |
| Holm and Dodd (1999)                      | 1   | 4;6      | SSD     | Core vocabulary approach                                       | E&H (SP)     | SCED (54.4)  | SP (Ac, Iv)                | English and Punjabi   | NA                                                                                                                                     |
| Holm et al. (1997)                        | 1   | 5;2      | SSD     | Articulation Therapy                                           | E (SP)       | SCED (81.8)  | SP (Ac)                    | Cantonese and English | NA                                                                                                                                     |
|                                           | 1   | NS       | SSD     | Phonological Therapy                                           | E (SP)       | SCED (81.8)  | SP (Ac)                    | Cantonese and English | NA                                                                                                                                     |
| Huennekens and Xu (2010)                  | 2   | 4;10-5;5 | At Risk | Parent Dialogic Reading Training                               | E&H (Ed, Fm) | SCED (72.7)  | LA (LE)                    | English               | NA                                                                                                                                     |

|                                   |     |                     |         |                                                                             |               |                 |                           |                                           |                                                                                                                                                                                         |
|-----------------------------------|-----|---------------------|---------|-----------------------------------------------------------------------------|---------------|-----------------|---------------------------|-------------------------------------------|-----------------------------------------------------------------------------------------------------------------------------------------------------------------------------------------|
| Ijalba (2015)                     | 24  | Mean<br>3;6-<br>3;7 | DLD     | Parent-implemented literacy intervention                                    | H<br>(Fm)     | EGC<br>(95.8)   | LA (VE, LE, L,<br>NR)     | English<br>Spanish<br>English/<br>Spanish | LA: $d^d = 1.42$<br>LA: $d^b = 3.54$<br>LA: $d^b = 6.14$                                                                                                                                |
| Kiernan and Swisher (1990)        | 4   | 4;11-<br>5;3        | At Risk | Novel Vocabulary Learning                                                   | E<br>(SP)     | SCED<br>(50.0)  | LA (VR)                   | English and<br>Spanish                    | LA: Positive                                                                                                                                                                            |
| Koutsoftas et al. (2009)          | 34  | 3-4yrs              | At Risk | Intervention for Phonemic Awareness                                         | E<br>(Ed, SP) | SCED<br>(100.0) | LI (Ph)                   | English                                   | LI: $d_2^e = 1.34$                                                                                                                                                                      |
| Landry et al. (2019)              | 829 | Mean<br>4;7         | At Risk | Preparing Pequeños [Little Ones]                                            | E<br>(Ed)     | EGC<br>(100.0)  | LA (VE, L)<br>LI (Pr, Ph) | English<br><br>Spanish                    | LA: $d^b = -0.03$<br>LI: $d^b = 0.08$<br><br>LA: $d^b = 0.07$<br>LI: $d^b = 0.34$                                                                                                       |
| Landry et al. (2017)              | 434 | 3;2-<br>6;0         | At Risk | The Early Education Model (TEEM) and/or Play and Learning Strategies (PALS) | E&H<br>(Fm)   | EGC<br>(95.8)   | LA (L)<br>LI (Pr, Ph)     | NS                                        | TEEM vs. control<br>LA: $d^b = 0.05$<br>LI: $d^b = 0.10$<br><br>PALS vs control<br>LA: $d^b = -0.18$<br>LI: $d^b = 0.05$<br><br>TEEM vs. PALS<br>LA: $d^b = -0.16$<br>LI: $d^b = -0.15$ |
| Leacox and Jackson (2014)         | 24  | 4-6yrs              | At Risk | Technology-enhanced English reading with Spanish bridging (TESB)            | E<br>(SP)     | CRO<br>(50.0)   | LA (VR, VE)               | English<br>Spanish                        | LA: $d^b = 0.95$<br>LA: $d^b = 0.61$                                                                                                                                                    |
| Lugo-Neris et al. (2010)          | 22  | 4;1-<br>6;10        | At Risk | Shared Storybook Reading                                                    | E<br>(SP)     | CRO<br>(100.0)  | LA (VR, VE)               | English                                   | Overall Changes (both Tx)<br>LA: $\eta^{2b} = 0.67$<br><br>English Tx vs. Spanish Tx<br>LA: $\eta^{2b} = 0.13$                                                                          |
| Mamdouh (2008)                    | 1   | 5;0                 | SSD     | Phonological Therapy                                                        | C<br>(NS)     | SCED<br>(54.5)  | SP (Ac, In)               | Arabic and<br>English                     | NA                                                                                                                                                                                      |
| Matera and Gerber (2008)          | 76  | Mean<br>4;8         | At Risk | Literacy Curriculum for Writing Development                                 | E<br>(Re, Or) | EGC<br>(58.3)   | LI (Wr)                   | English<br>Spanish                        | LI: $g^b = 0.51$<br>LI: $g^b = 0.70$                                                                                                                                                    |
| Méndez et al. (2015) <sup>1</sup> | 42  | Mean<br>4;3         | At Risk | Evidence-informed shared reading vocabulary approach                        | E<br>(SP)     | EGC<br>(87.5)   | LA (VR, VE)               | English<br>Spanish                        | LA: $d^b = 0.63$<br>LA: $d^b = 0.18$                                                                                                                                                    |

|                                   |     |             |         |                                                                                          |            |             |             |                                        |                                                                                                                                 |
|-----------------------------------|-----|-------------|---------|------------------------------------------------------------------------------------------|------------|-------------|-------------|----------------------------------------|---------------------------------------------------------------------------------------------------------------------------------|
| Méndez et al. (2018) <sup>2</sup> | 35  | Mean<br>4;3 | At Risk | Evidence-informed shared reading vocabulary approach                                     | E (SP)     | EGC (87.5)  | LA (VR, VE) | English<br>Spanish                     | LA: $d^a = 0.28$<br>LA: $d^a = 0.33$                                                                                            |
| Motsch and Schmidt (2010)         | 49  | 4;0-6;0     | DLD     | Intensive Context-Optimized Therapy vs. Context-Optimized Therapy vs Traditional therapy | E (SP)     | EGC (75.0)  | LA (MS)     | Luxembourgish and French or Portuguese | LA: NC                                                                                                                          |
| Neuman and Kaefer (2018)          | 265 | PreK and K  | At Risk | World of Words (adapted)                                                                 | E (Ed)     | EGC (95.8)  | LA (VR, VE) | English                                | LA: NC                                                                                                                          |
| Peredo et al. (2018)              | 3   | 2;9-3;3     | DLD     | Teach-Model-Coach-Review instructional approach                                          | H (Fm)     | SCED (90.9) | LA (VE)     | Spanish                                | LA: Positive                                                                                                                    |
| Pham et al. (2011)                | 1   | 3;11        | DLD     | Receptive Vocabulary Training                                                            | E (Ed, Te) | SCED (86.4) | LA (VR)     | English and Vietnamese                 | NA                                                                                                                              |
|                                   | 1   | 4;2         | DLD     | Receptive Vocabulary Training                                                            | E (Ed, Te) | SCED (86.4) | LA (VR)     | English and Vietnamese                 | NA                                                                                                                              |
|                                   | 1   | 4;4         | DLD     | Receptive Vocabulary Training                                                            | E (Ed, Te) | SCED (86.4) | LA (VR)     | English and Vietnamese                 | NA                                                                                                                              |
|                                   | 1   | 4;5         | DLD     | Receptive Vocabulary Training                                                            | E (Ed, Te) | SCED (86.4) | LA (VR)     | English and Vietnamese                 | NA                                                                                                                              |
| Pollard-Durodola et al. (2018)    | 252 | Mean<br>4;8 | At Risk | Words of Oral Reading and Language Development (WORLD)                                   | E (Ed)     | EGC (100.0) | LA (VR, VE) | English                                | LA: $d^b = 0.56$                                                                                                                |
| Ray (2002)                        | 1   | 5yrs        | SSD     | Cognitive-linguistic approach                                                            | C (SP)     | SCED (50.0) | SP (Ac, In) | English, Hindi, and Gujarati           | NA                                                                                                                              |
| Restrepo et al. (2010)            | 45  | Mean<br>4;8 | At Risk | Supplemental instruction program                                                         | E (SP)     | EGC (100.0) | LA (L)      | Spanish                                | LA: $d^a = 0.63$                                                                                                                |
| Restrepo et al. (2013)            | 256 | 3;7-5;8     | DLD     | Vocabulary instruction                                                                   | E (Ed, Or) | EGC (83.3)  | LA (VR, VE) | English                                | LA:<br>Bilingual Tx vs Controls: $d^a = 1.07$<br>English Tx vs Controls: $d^a = 0.85$<br>Bilingual vs English Tx: $d^a = 0.25$  |
|                                   |     |             |         |                                                                                          |            |             |             | Spanish                                | LA:<br>Bilingual Tx vs Controls: $d^a = 1.26$<br>English Tx vs Controls: $d^a = -0.26$<br>Bilingual vs English Tx: $d^a = 1.61$ |
|                                   |     |             |         |                                                                                          |            |             |             | English/Spanish                        | LA:<br>Bilingual Tx vs Controls: $d^a = 1.42$<br>English Tx vs Controls: $d^a = 0.58$<br>Bilingual vs English Tx: $d^a = 1.02$  |

|                                             |     |               |             |                                                                           |                |              |                          |                          |                                                                                    |
|---------------------------------------------|-----|---------------|-------------|---------------------------------------------------------------------------|----------------|--------------|--------------------------|--------------------------|------------------------------------------------------------------------------------|
| Rivera Pérez et al. (2019)                  | 43  | 3;1-5;0       | At Risk     | Computer-assisted instruction                                             | E (SP)         | EGC (83.3)   | LA (VE)                  | English                  | LA: Bilingual Tx vs Controls: $d^E = 2.13$<br>English Tx vs Controls: $d^E = 0.18$ |
|                                             |     |               |             |                                                                           |                |              |                          | Spanish                  | LA: Bilingual Tx vs Controls: $d^E = 2.11$<br>English Tx vs Controls: $d^E = 0.37$ |
| Roberts (2008)                              | 33  | Mean 4;6      | At Risk     | Home Storybook Reading in Primary Language vs in Second Language          | E&H (Ed, Fm)   | CRO (79.2)   | LA (VR, L)               | English (all)            | LA: $d^b = 0.87$                                                                   |
|                                             |     |               |             |                                                                           |                |              |                          | Spanish (n=13)           | LA: $d^b = 0.50$                                                                   |
| Rossouw and Pascoe (2018)                   | 1   | 4;2           | SSD         | Minimal pairs approach                                                    | E (SP)         | SCED (77.3)  | SP (Ac, Iv)              | English and isiXhosa     | NA                                                                                 |
| Simon-Cerejido and Gutiérrez-Clellen (2014) | 107 | Mean 4;5      | At Risk DLD | Vocabulary, Oral Language and Academic Readiness (VOLAR)                  | E (Ed)         | EGC (100.0)  | LA (LE)                  | English (All)            | LA: $d^b = -0.11$                                                                  |
|                                             |     |               |             |                                                                           |                |              |                          | Spanish (All)            | LA: $d^b = 0.22$                                                                   |
|                                             |     |               |             |                                                                           |                |              |                          | English (DLD)            | LA: $d^b = -0.09$                                                                  |
|                                             |     |               |             |                                                                           |                |              |                          | Spanish (DLD)            | LA: $d^b = -0.15$                                                                  |
| Soto et al. (2020)                          | 4   | 4,10-6,6      | At Risk     | PAsos Para Leer [PATH to Literacy]                                        | E (Or)         | SCED (86.4)  | LI (Pr, Ph)              | English                  | LI: Tau-U <sup>b</sup> = 0.62                                                      |
|                                             |     |               |             |                                                                           |                |              |                          | Spanish                  | LI: Tau-U <sup>b</sup> = 0.60                                                      |
| Spencer et al. (2015)                       | 21  | Mean 3;10-4;2 | At Risk     | Story Champs                                                              | E (Fa, Or, SP) | EGC (95.8)   | LA (NE)                  | English                  | LA: $d^b = 0.80$                                                                   |
| Spencer et al. (2019)                       | 8   | 3,3-5,0       | At Risk     | Dual language narrative intervention with embedded vocabulary instruction | E (Ed, Or)     | SCED (100.0) | LA (VR, NE)              | English                  | LA (VR): $d^b = 0.98$<br>LA (NE): Positive                                         |
|                                             |     |               |             |                                                                           |                |              |                          | Spanish                  | LA (VR): $d^b = 0.34$<br>LA (NE): Neutral                                          |
| Thordardottir et al. (2015)                 | 29  | 3;9-5;8       | DLD         | Focused Stimulation                                                       | C (Fm, SP)     | EGC (100.0)  | LA (VR, VE, LR, LE, MS,) | French and home language | LA: NC                                                                             |
| Thordardottir and Rioux (2019)              | 15  | 3;6-5;9       | DLD         | DLD intervention                                                          | C (SP)         | EGC (70.8)   | LA (VR, VE, MS)          | French                   | LA: NC                                                                             |
| Thordardottir et al. (1997)                 | 1   | 4;11          | DLD         | Vocabulary Intervention                                                   | C (SP)         | SCED (77.3)  | LA (VE)                  | French                   | NA                                                                                 |
| Tsybina and Eriks-Brophy (2010)             | 12  | 1;10-3;6      | At Risk     | Dialogic book-reading                                                     | H (Fm)         | EGC (87.5)   | LA (VE)                  | English                  | LA: $d^b = 0.80$                                                                   |
|                                             |     |               |             |                                                                           |                |              |                          | Spanish                  | LA: $d^b = 0.95$                                                                   |
| van Tuijl et al. (2001)                     | 319 | 4;0-5;2       | At Risk     | Opstap Opnieuw [Step Up Again]                                            | H (Fm)         | EGC (100.0)  | LA (VR, VE)              | Dutch                    | LA: $d^b = -0.04$                                                                  |

|                      |     |          |         |                                                                                                                               |        |             |             |                                             |                                       |
|----------------------|-----|----------|---------|-------------------------------------------------------------------------------------------------------------------------------|--------|-------------|-------------|---------------------------------------------|---------------------------------------|
|                      |     |          |         |                                                                                                                               |        |             |             | Moroccan-Arabic, Tarafit-Berber, or Turkish | LA: $d^b = 0.02$                      |
| Wahn (2016)          | 36  | 3;10-6;1 | DLD     | Specific Language Support vs. Specific Language Promotion vs. Language Promotion vs. Semantic-Phonological Elaboration Method | E (SP) | EGC (29.2)  | LA (VR, MS) | German                                      | LA: NC                                |
| Zucker et al. (2021) | 167 | Mean 4.8 | At Risk | Hablemos Juntos                                                                                                               | E (Ed) | EGC (100.0) | LA (VR, VE) | English<br>Spanish                          | LA: $g^b = -0.03$<br>LA: $g^b = 0.49$ |

*Notes.*

**Reference:** <sup>1</sup> = Replication data only; <sup>2</sup> = Original data only.

**Age:** yrs = years.

**Group:** DLD = developmental language disorder; SSD = speech sound disorder.

**Setting:** C = clinical; E = educational; H = home.

**Agent:** Ed = educator; Fm = family; Or = other; Re = researcher; SP = speech-language pathologist; Te = technology.

**Design:** COR = correlational; CRO = crossover; EGC = experimental group comparison; SCED = single-case experimental design.

**Quality:** <sup>3</sup> = quality ratings expressed as percentages.

**Domain:** LA = language; LI = literacy; SP = speech.

**Sub-domain:** In = intelligibility; Ac = accuracy; Iv = inventory; V = vocabulary (not further specified), VR = receptive vocabulary; VE = expressive vocabulary; L = language (not further specified); LR = receptive language; LE = expressive language; NR = narrative (not further specified); NE = expressive narrative; MS = morphosyntax; Pr = pre/emergent literacy/reading; Ph = phonological awareness; Wr = writing.

**Domain and Effect Size:** <sup>4</sup> = Where the same domain was examined in more than one language, the average effect size is presented, **green** is a positive effect ( $d \geq 0.25$ ;  $\eta^2 \geq 0.01$ ;  $g \geq 0.5$ ), **blue** is a neutral effect ( $-0.25 < d < 0.25$ ), **red** is a negative effect ( $d \leq -0.25$ ), black is unable to be interpreted within the CEC (2014) framework; Tx = therapy/intervention; NC = not able to be calculated; <sup>a</sup> =  $d_{pec}$  calculated by the authors from means, standard deviations and sample sizes reported by study authors, following Morris (2008); <sup>b</sup> = value reported by study authors; <sup>c</sup> = Cohen's  $q$  calculated by the authors from  $r$  values reported by study authors, following Cohen (1988, p. 110); <sup>d</sup> = calculated by authors from post-test data reported by study authors as pre-test values were 0; <sup>e</sup> = individual effect size following Busk and Serlin (1992) as reported by the study authors; <sup>f</sup> = Nonoverlap of All Pairs (NAP) effect-size index for single-case designs as described by Parker and Vannest (2009); <sup>g</sup> = calculated from Odds Ratios reported by the study authors following Borenstein et al. (2009).

**Anywhere:** NA = not applicable; NC = Not able to be calculated; NS = Not specified in article.

## References

- Bekman, S., Aksu-Koc, A., & Erguvanli-Taylan, E. (2011). Effectiveness of an intervention program for six-year-olds: A summer-school model. *European Early Childhood Education Research Journal*, 19(4), 409-431. <https://doi.org/10.1080/1350293X.2011.623508>
- Borenstein, M., Hedges, L. V., Higgins, J. P. T., & Rothstein, H. R. (2009). *Introduction to meta-analysis*. Wiley.
- Boyce, L. K., Innocenti, M. S., Roggman, L. A., Norman, V. K. J., & Ortiz, E. (2010). Telling stories and making books: Evidence for an intervention to help parents in migrant head start families support their children's language and literacy. *Early Education and Development*, 21(3), 343-371. <https://doi.org/10.1080/10409281003631142>
- Brannon, D., & Dauksas, L. (2012). Increasing the expressive vocabulary of young children learning english as a second language through parent involvement. *Procedia: Social and Behavioral Sciences*, 69, 1324-1331. <https://doi.org/https://doi.org/10.1016/j.sbspro.2012.12.069>
- Brannon, D., & Dauksas, L. (2014). The effectiveness of dialogic reading in increasing English language learning preschool children's expressive language. *International Research in Early Childhood Education*, 5(1), 1-10.
- Busk, P. L., & Serlin, R. C. (1992). Meta-analysis for single case research. In T. R. Kratochwill & J. R. Levin (Eds.), *Single-case research design and analysis: New directions for psychology and education*. Erlbaum.
- Buysse, V., Castro, D. C., & Peisner-Feinberg, E. (2010). Effects of a professional development program on classroom practices and outcomes for Latino dual language learners. *Early Childhood Research Quarterly*, 25(2), 194-206. <https://doi.org/10.1016/j.ecresq.2009.10.001>
- Caesar, L. G., & Nelson, N. W. (2014). Parental involvement in language and literacy acquisition: A bilingual journaling approach. *Child Language Teaching and Therapy*, 30(3), 317-336. <https://doi.org/10.1177/0265659013513028>
- Castro, D. C., Gillanders, C., Franco, X., Bryant, D. M., Zepeda, M., Willoughby, M. T., & Méndez, L. I. (2017). Early education of dual language learners: An efficacy study of the Nuestros Niños School Readiness professional development program. *Early Childhood Research Quarterly*, 40, 188-203. <https://doi.org/10.1016/j.ecresq.2017.03.002>
- Cohen, J. (1988). *Statistical power analysis for the behavioral sciences* (2nd ed.). Lawrence Erlbaum.
- Cooke, N. L., Mackiewicz, S. M., Wood, C. L., & Helf, S. (2009). The use of audio prompting to assist mothers with limited English proficiency in tutoring their pre-kindergarten children on english vocabulary. *Education and Treatment of Children*, 32(2), 213-229. [www.jstor.org/stable/42900019](http://www.jstor.org/stable/42900019)
- Correa, V. I., Lo, Y.-Y., Godfrey-Hurrell, K., Swart, K., & Luft Baker, D. (2015). Effects of adapted dialogic reading on oral language and vocabulary knowledge of Latino preschoolers at risk for English language delays. *Multiple Voices for Ethnically Diverse Exceptional Learners*, 15(2), 3-21. <https://doi.org/10.5555/2158-396x.15.2.3>
- Council for Exceptional Children. (2014). Council for Exceptional Children: Standards for evidence-based practices in special education. *Teaching Exceptional Children*, 46(6), 206-212. <https://doi.org/10.1177/0040059914531389>
- Dockrell, J. E., Stuart, M., & King, D. (2010). Supporting early oral language skills for English language learners in inner city preschool provision. *British Journal of Educational Psychology*, 80(Pt 4), 497-515. <https://doi.org/10.1348/000709910x493080>
- Farver, J. A., Lonigan, C. J., & Eppe, S. (2009). Effective early literacy skill development for young Spanish-speaking English language learners: an experimental study of two methods. *Child Development*, 80(3), 703-719. <https://doi.org/10.1111/j.1467-8624.2009.01292.x>
- Gildersleeve-Neumann, C., & Goldstein, B. A. (2015). Cross-linguistic generalization in the treatment of two sequential Spanish-English bilingual children with speech sound disorders. *International Journal of Speech-Language Pathology*, 17(1), 26-40. <https://doi.org/10.3109/17549507.2014.898093>
- Gonzales, W., & Tejero Hughes, M. (2018). Libros en mano: Phonological awareness intervention in children's native languages. *Education Sciences*, 8(4), 175. <https://doi.org/10.3390/educsci8040175>
- Greenwood, C. R., Carta, J. J., Kelley, E. S., Guerrero, G., Kong, N. Y., Atwater, J., & Goldstein, H. (2016). Systematic replication of the effects of a supplementary, technology-assisted, storybook intervention for preschool children with weak vocabulary and comprehension skills. *The Elementary School Journal*, 116(4), 574-599. <https://doi.org/10.1086/686223>

- Gutiérrez-Clellen, V., Simon-Cerejido, G., & Sweet, M. (2012). Predictors of second language acquisition in Latino children with specific language impairment. *American Journal of Speech-Language Pathology*, 21(1), 64-77. [https://doi.org/10.1044/1058-0360\(2011/10-0090\)](https://doi.org/10.1044/1058-0360(2011/10-0090))
- Hammer, C. S., & Sawyer, B. (2016). Effects of a culturally responsive interactive book-reading intervention on the language abilities of preschool dual language learners: A pilot study. *NHSA Dialog*, 18, 59-19.
- Holm, A., & Dodd, B. (1999). An intervention case study of a bilingual child with phonological disorder. *Child Language Teaching and Therapy*, 15(2), 139. <https://doi.org/10.1177/026565909901500203>
- Holm, A., Dodd, B., & Ozanne, A. (1997). Efficacy of intervention for a bilingual child making articulation and phonological errors. *International Journal of Bilingualism*, 1(1), 55-69. <https://doi.org/10.1177/136700699700100105>
- Huennekens, M. E., & Xu, Y. (2010). Effects of a cross-linguistic storybook intervention on the second language development of two preschool English language learners. *Early Childhood Education Journal*, 38(1), 19-26. <https://doi.org/10.1007/s10643-010-0385-1>
- Ijalba, E. (2015). Effectiveness of a parent-implemented language and literacy intervention in the home language. *Child Language Teaching and Therapy*, 31(2), 207-220. <https://doi.org/10.1177/0265659014548519>
- Kiernan, B., & Swisher, L. (1990). The initial learning of novel English words: Two single-subject experiments with minority-language children. *Journal of Speech and Hearing Research*, 33(4), 707-716. <https://doi.org/10.1044/jshr.3304.707>
- Koutsoftas, A. D., Harmon, M. T., & Gray, S. (2009). The effect of Tier 2 intervention for phonemic awareness in a response-to-intervention model in low-income preschool classrooms. *Language, Speech, and Hearing Services in Schools*, 40(2), 116-130. [https://doi.org/10.1044/0161-1461\(2008/07-0101\)](https://doi.org/10.1044/0161-1461(2008/07-0101))
- Landry, S. H., Assel, M. A., Carlo, M. S., Williams, J. M., Wu, W., & Montroy, J. J. (2019). The effect of the Preparing Pequeños small-group cognitive instruction program on academic and concurrent social and behavioral outcomes in young Spanish-speaking dual-language learners. *Journal of School Psychology*, 73, 1-20. <https://doi.org/10.1016/j.jsp.2019.01.001>
- Landry, S. H., Zucker, T. A., Williams, J. M., Merz, E. C., Guttentag, C. L., & Taylor, H. B. (2017). Improving school readiness of high-risk preschoolers: Combining high quality instructional strategies with responsive training for teachers and parents. *Early Childhood Research Quarterly*, 40, 38-51. <https://doi.org/10.1016/j.ecresq.2016.12.001>
- Leacox, L., & Jackson, C. W. (2014). Spanish vocabulary-bridging technology-enhanced instruction for young English language learners' word learning. *Journal of Early Childhood Literacy*, 14(2), 175-197. <https://doi.org/10.1177/1468798412458518>
- Lugo-Neris, M. J., Jackson, C. W., & Goldstein, H. (2010). Facilitating vocabulary acquisition of young English language learners. *Language, Speech, and Hearing Services in Schools*, 41(3), 314-327. [https://doi.org/10.1044/0161-1461\(2009/07-0082\)](https://doi.org/10.1044/0161-1461(2009/07-0082))
- Mamdouh, H. (2008). Management of delayed language affecting phonology in a bilingual child. *El Minia Medical Bulletin*, 19(1), 38-45.
- Matera, C., & Gerber, M. M. (2008). Effects of a literacy curriculum that supports writing development of Spanish-speaking English learners in head start. *NHSA Dialog*, 11(1), 25-43. <https://doi.org/10.1080/15240750701813865>
- Méndez, L. I., Crais, E. R., Castro, D. C., & Kainz, K. (2015). A culturally and linguistically responsive vocabulary approach for young latino dual language learners. *Journal of Speech, Language and Hearing Research*, 58(1), 93-106. [https://doi.org/10.1044/2014\\_JSLHR-L-12-0221](https://doi.org/10.1044/2014_JSLHR-L-12-0221)
- Méndez, L. I., Crais, E. R., & Kainz, K. (2018). The impact of individual differences on a bilingual vocabulary approach for latino preschoolers. *Journal of Speech, Language and Hearing Research*, 61(4), 897-909. [https://doi.org/10.1044/2018\\_jslhr-l-17-0186](https://doi.org/10.1044/2018_jslhr-l-17-0186)
- Morris, S. B. (2008). Estimating effect sizes from pretest-posttest-control group designs. *Organizational Research Methods*, 11(2), 364-386. <https://doi.org/10.1177/1094428106291059>
- Motsch, H.-J., & Schmidt, M. (2010). Interlanguage-Effekte in der Therapie spracherwerbsgestörter Kinder [Interlanguage-effects in the therapy with specific language impaired children]. *Vierteljahresschrift für Heilpädagogik und ihre Nachbargebiete*, 79(2), 131-141. <https://doi.org/10.2378/vhn2010.art11d>
- Neuman, S. B., & Kaefer, T. (2018). Developing low-income children's vocabulary and content knowledge through a shared book reading program. *Contemporary Educational Psychology*, 52, 15-24. <https://doi.org/10.1016/j.cedpsych.2017.12.001>



- Parker, R. I., & Vannest, K. (2009). An improved effect size for single-case research: Nonoverlap of all pairs. *Behavior Therapy, 40*(4), 357-367. <https://doi.org/10.1016/j.beth.2008.10.006>
- Peredo, T. N., Zelaya, M. I., & Kaiser, A. P. (2018). Teaching low-income Spanish-speaking caregivers to implement EMT en Español with their young children with language impairment: A pilot study. *American Journal of Speech-Language Pathology, 27*(1), 136-153. [https://doi.org/10.1044/2017\\_ajslp-16-0228](https://doi.org/10.1044/2017_ajslp-16-0228)
- Pham, G., Kohnert, K., & Mann, D. (2011). Addressing clinician-client mismatch: A preliminary intervention study with a bilingual Vietnamese-English preschooler. *Language, Speech, and Hearing Services in Schools, 42*(4), 408-422. [https://doi.org/10.1044/0161-1461\(2011/10-0073\)](https://doi.org/10.1044/0161-1461(2011/10-0073))
- Pollard-Durodola, S. D., Gonzalez, J. E., Saenz, L., Resendez, N., Kwok, O., Zhu, L., & Davis, H. (2018). The effects of content-enriched shared book reading versus vocabulary-only discussions on the vocabulary outcomes of preschool dual language learners. *Early Education and Development, 29*(2), 245-265. <https://doi.org/10.1080/10409289.2017.1393738>
- Ray, J. (2002). Treating phonological disorders in a multilingual child: A case study. *Journal of Speech-Language Pathology, 11*(3), 305-315. [https://doi.org/10.1044/1058-0360\(2002/035\)](https://doi.org/10.1044/1058-0360(2002/035))
- Restrepo, M. A., Castilla, A. P., Schwanenflugel, P. J., Neuharth-Pritchett, S., Hamilton, C. E., & Arboleda, A. (2010). Effects of a supplemental Spanish oral language program on sentence length, complexity, and grammaticality in Spanish-speaking children attending English-only preschools. *Language, Speech, and Hearing Services in Schools, 41*(1), 3-13. [https://doi.org/10.1044/0161-1461\(2009/06-0017\)](https://doi.org/10.1044/0161-1461(2009/06-0017))
- Restrepo, M. A., Morgan, G. P., & Thompson, M. S. (2013). The efficacy of a vocabulary intervention for dual-language learners with language impairment. *Journal of Speech, Language and Hearing Research, 56*(2), 748-765. [https://doi.org/10.1044/1092-4388\(2012/11-0173\)x](https://doi.org/10.1044/1092-4388(2012/11-0173)x)
- Rivera Pérez, J. F., Creaghead, N. A., Washington, K., Guo, Y., Raisor-Becker, L., & Combs, S. (2019). Using audio prompting to assist monolingual speech-language pathologists to teach English-Spanish vocabulary to English learners. *Communication Disorders Quarterly, 41*(1), 3-11. <https://doi.org/10.1177/1525740118819659>
- Roberts, T. A. (2008). Home storybook reading in primary or second language with preschool children: Evidence of equal effectiveness for second-language vocabulary acquisition. *Reading Research Quarterly, 43*(2), 103-130. <https://doi.org/10.1598/RRQ.43.2.1>
- Rossouw, K., & Pascoe, M. (2018). Intervention for bilingual speech sound disorders: A case study of an isiXhosa-English-speaking child. *The South African Journal of Communication Disorders, 65*(1), e1-e10. <https://doi.org/10.4102/sajcd.v65i1.566>
- Simon-Cerejido, G., & Gutiérrez-Clellen, V. F. (2014). Bilingual education for all: Latino dual language learners with language disabilities. *International Journal of Bilingual Education and Bilingualism, 17*(2), 235-254. <https://doi.org/10.1080/13670050.2013.866630>
- Soto, X. T., Crucet-Choi, A., & Goldstein, H. (2020). Effects of a supplemental Spanish phonological awareness intervention on Latinx preschoolers' dual language emergent literacy skills. *American Journal of Speech-Language Pathology, 29*(3), 1283-1300. [https://doi.org/10.1044/2020\\_AJSLP-20-00029](https://doi.org/10.1044/2020_AJSLP-20-00029)
- Spencer, T. D., Petersen, D. B., & Adams, J. L. (2015). Tier 2 language intervention for diverse preschoolers: An early-stage randomized control group study following an analysis of response to intervention. *American Journal of Speech-Language Pathology, 24*(4), 619-636. [https://doi.org/10.1044/2015\\_ajslp-14-0101](https://doi.org/10.1044/2015_ajslp-14-0101)
- Spencer, T. D., Petersen, D. B., Restrepo, M. A., Thompson, M., & Gutierrez Arvizu, M. N. (2019). The effect of Spanish and English narrative intervention on the language skills of young dual language learners. *Topics in Early Childhood Special Education, 38*(4), 204-219. <https://doi.org/10.1177/0271121418779439>
- Thordardottir, E. T., Cloutier, G., Ménard, S., Pelland-Blais, E., & Rvachew, S. (2015). Monolingual or bilingual intervention for primary language impairment? A randomized control trial. *Journal of Speech, Language, and Hearing Research, 58*, 287-300. [https://doi.org/10.1044/2014\\_JSLHR-L-13-0277](https://doi.org/10.1044/2014_JSLHR-L-13-0277)
- Thordardottir, E. T., & Rioux, E. J. (2019). Does efficacy equal lasting impact? A study of intervention short term gains, impact on diagnostic status, and association with background variables. *Folia Phoniatrica et Logopaedica, 71*(2-3), 71-82. <https://doi.org/10.1159/000493125>

- Thordardottir, E. T., Weismer, S. E., & Smith, M. E. (1997). Vocabulary learning in bilingual and monolingual clinical intervention. *Child Language Teaching and Therapy*, 13(3), 215-227. <https://doi.org/10.1177/026565909701300301>
- Tsybina, I., & Eriks-Brophy, A. (2010). Bilingual dialogic book-reading intervention for preschoolers with slow expressive vocabulary development. *Journal of Communication Disorders*, 43(6), 538-556. <https://doi.org/10.1016/j.jcomdis.2010.05.006>
- van Tuijl, C., Leseman, P. P. M., & Rispens, J. (2001). Efficacy of an intensive home-based educational intervention programme for 4- to 6-year-old ethnic minority children in the Netherlands. *International Journal of Behavioral Development*, 25(2), 148-159. <https://doi.org/10.1080/01650250042000159>
- Wahn, C. (2016). Zur sprachspezifischen Förderung von Vorschulkindern am Beispiel der semantisch-lexikalischen Spracherwerbsebene. Erste Ergebnisse einer Evaluation von Förderformaten als Kurzzeitintervention [Specific language Intervention for children in preschool considering semantic-lexical aspects—First results for the evaluation of short-time interventions]. *Frühförderung interdisziplinär*, 35(4), 210-223. <https://doi.org/10.2378/fi2016.art26d>
- Zucker, T. A., Carlo, M. S., Montroy, J. J., & Landry, S. H. (2021). Pilot test of the Hablemos Juntos Tier 2 academic language curriculum for Spanish-speaking preschoolers. *Early Childhood Research Quarterly*, 55, 179-192. <https://doi.org/10.1016/j.ecresq.2020.11.009>
