# Supplementary material
Source: publisher figshare collection journal article supplement (https://asha.figshare.com/articles/dataset/_/16632649)
Supplement: Supplementary file 4 [file 1]

## Supplemental Material S2. Search strategy.

| Database                                                         | Search String                                                                                                                                                                                                                                                                                                                                                                                                                         | Limits                                                 | Search Dates | Number of Results   |
|------------------------------------------------------------------|---------------------------------------------------------------------------------------------------------------------------------------------------------------------------------------------------------------------------------------------------------------------------------------------------------------------------------------------------------------------------------------------------------------------------------------|--------------------------------------------------------|--------------|---------------------|
| EBSCO<br>(CINAHL Plus,<br>ERIC, PsycINFO,<br>Medline, Education) | AB (bilingual OR language learn* OR multilingual)<br>AND ("at risk" OR disability OR disorder OR<br>handicap OR impairment OR pathology) AND<br>("functional communication" OR language OR literacy<br>OR phonology OR pragmatics OR read OR social<br>skills OR speech OR syntax OR vocabulary) AND<br>(approach OR intervention* OR strateg* OR therapy)<br>AND (child OR paediatric OR pediatric OR preschool)                     | After 1990<br>articles                                 | October 2019 | 10,002 <sup>a</sup> |
|                                                                  |                                                                                                                                                                                                                                                                                                                                                                                                                                       | English<br>October 2019-2021<br>Peer-reviewed articles | April 2021   | 305 <sup>b</sup>    |
| LLBA                                                             | ab((bilingual OR language learn* OR multilingual))<br>AND ab(("at risk" OR disability OR disorder OR<br>handicap OR impairment OR pathology)) AND<br>ab(("functional communication" OR language OR<br>literacy OR phonology OR pragmatics OR read OR<br>social skills OR speech OR syntax OR vocabulary))<br>AND ab((approach OR intervention* OR strateg* OR<br>therapy)) AND ab((child OR paediatric OR pediatric<br>OR preschool)) | From 1990<br>Peer-reviewed articles                    | October 2019 | 7,986 <sup>a</sup>  |
|                                                                  |                                                                                                                                                                                                                                                                                                                                                                                                                                       | October 2019-2021<br>Peer-reviewed articles            | April 2021   | 25 <sup>b</sup>     |

*Note.* <sup>a</sup> The search in October 2019 was conducted using only AND in the command (i.e., bilingual AND “at risk” AND “functional communication” AND approach AND child) resulting in 3360 separate searches in each database. <sup>b</sup> The search in April 2021 was conducted using OR in the command (i.e., as displayed in the search strings above) resulting in one search per database and far fewer records that were irrelevant to this review and duplicate records being retrieved.
